# Supplementary material for: High efficiency hybrid white organic light-emitting diodes based on a simple and efficient exciton regulation emissive layer structure
Source: Royal Society of Chemistry journal article supplement (doi:10.1039/c8ra08753a), 2018-01-01
Supplement: c8ra08753a1.pdf [file c8ra08753a1.pdf]

---

## Electronic Supplementary Information

### **High Efficiency Hybrid White Organic Light-Emitting Diodes based on a Simple and Efficient Exciton Regulation Emissive Layer Structure**

Yuwen Chen, Shian Ying, Qian Sun, Yanfeng Dai, Xianfeng Qiao, Dezhi Yang,  
Jiangshan Chen and Dongge Ma\*

*Institute of Polymer Optoelectronic Materials and Devices, State Key Laboratory of  
Luminescent Materials and Devices, South China University of Technology,  
Guangzhou, 510640, People's Republic of China*

E-mail: msdgm@scut.edu.cn

## Contents

### Figures

**Figure S1.** Schematic structure of designed Blue OLED

**Figure S2.** The molecular structures of organic materials used for OLED in this work.

**Table S1.** Summary of EL performances of the resulting WOLEDs.

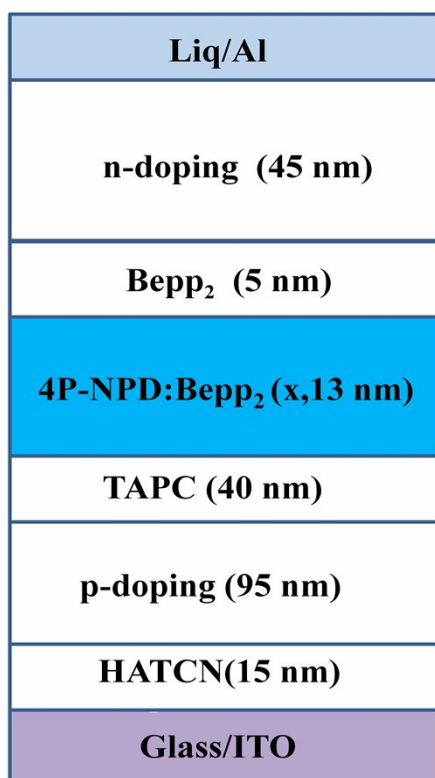

**Figure S1.** Schematic structure of designed Blue OLED

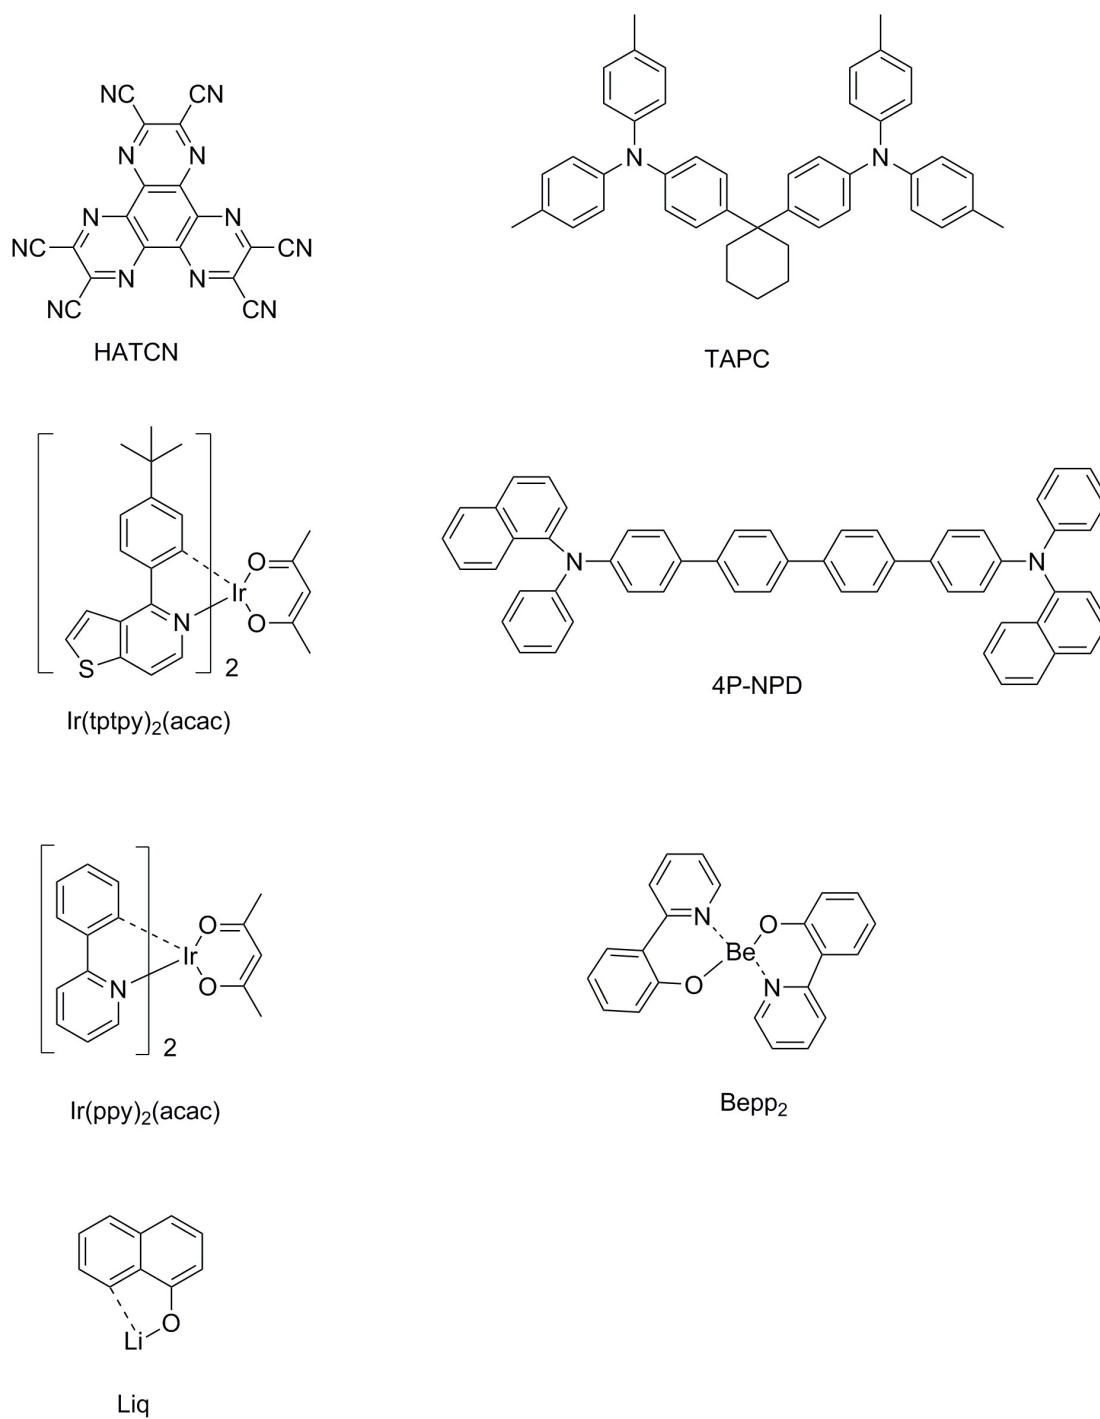

**Figure S2.** The molecular structures of organic materials used for OLED in this work.

**W1 structure:** ITO/HAT-CN (15 nm)/TAPC: HAT-CN (4/2, 95 nm)/TAPC (40 nm)/4P-NPD: Ir(tptpy)<sub>2</sub>(acac) (4%, 5 nm)/4P-NPD: Bepp<sub>2</sub> (1: 1, 13 nm)/Bepp<sub>2</sub> (2 nm)/Ir(ppy)<sub>2</sub>(acac) (0.4 nm)/Bepp<sub>2</sub> (3 nm)/Bepp<sub>2</sub>: Liq (4.5%, 50 nm)/Liq (1.25 nm)/Al,

**W2 structure:** ITO/HAT-CN (15 nm)/TAPC: HAT-CN (4/2, 95 nm)/TAPC (40 nm)/4P-NPD: Ir(tptpy)<sub>2</sub>(acac) (4%, 5 nm)/4P-NPD: Bepp<sub>2</sub> (2: 1, 13 nm)/Bepp<sub>2</sub> (5nm)/Bepp<sub>2</sub>: Liq (4.5%, 50 nm)/Liq (1.25 nm)/Al.

**W6 structure:** ITO/HATCN (15 nm)/TAPC: HATCN (4/2, 95 nm)/TAPC (40 nm)/4P-NPD: Ir(tptpy)<sub>2</sub>(acac) (4%, 5 nm)/4P-NPD: Bepp<sub>2</sub> (2: 1, 13 nm)/Bepp<sub>2</sub> (2 nm)/Ir(ppy)<sub>2</sub>(acac) (0.4 nm)/Bepp<sub>2</sub> (3 nm)/Bepp<sub>2</sub>: Liq (4.5%, 50 nm)/Liq (1.25 nm)/Al.

**Table S1** Summary of EL performances of the resulting WOLEDs.

| Device | V <sub>on</sub> <sup>a</sup> (V) | Max/@100 cd m <sup>-2</sup> /@1000 cd m <sup>-2</sup> |                          |                | CRI <sup>b</sup> | CIE <sup>b</sup> (x,y) |
|--------|----------------------------------|-------------------------------------------------------|--------------------------|----------------|------------------|------------------------|
|        |                                  | CE (cd A <sup>-1</sup> )                              | PE (lm W <sup>-1</sup> ) | EQE (%)        |                  |                        |
| W1     | 2.6                              | 58.3/56.7/48.7                                        | 65.5/59.3/44.9           | 16.7/13.5/11.0 | 42               | (0.43,0.52)            |
| W2     | 2.6                              | 47.3/34.5/18.2                                        | 57.2/33.9/13.5           | 15.8/12.1/13.5 | 51               | (0.36,0.37)            |
| W6     | 2.6                              | 60.3/40.8/28.3                                        | 72.9/37.7/20.2           | 18.2/12.5/8.8  | 46               | (0.40,0.49)            |

<sup>a</sup> Turn-on voltage estimated at a brightness of >1cd m<sup>-2</sup>. <sup>b</sup> Emission peak and the corresponding CRI and CIE coordinates obtained at a voltage of 4 V.

**Table S1.** Summary of EL performances of the resulting WOLEDs.
